# Supplementary material for: Function of the SNARE Ykt6 on autophagosomes requires the Dsl1 complex and the Atg1 kinase complex
Source: PubMed Central journal article supplement (PMC7726795; doi:10.15252/embr.202050733), 2020-10-07
Supplement: EMBR-21-e50733-s001.pdf [file EMBR-21-e50733-s001.pdf]

## Expanded View Figures

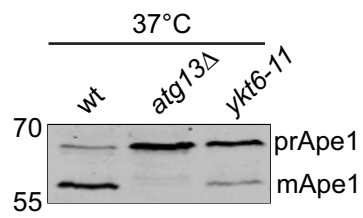

**Figure EV1. Ape1 transport in wild-type and mutant cells.**

Cells were grown at 24°C to mid-log phase and then shift to 37°C for 2 h. Samples were prepared by TCA precipitation, resolved on SDS gels, blotted to nitrocellulose, and decorated with an antibody to Ape1.
